# Supplementary material for: Evaluating the use of blood pressure polygenic risk scores across race/ethnic background groups
Source: PubMed Central journal article supplement (PMC10238525; doi:10.1038/s41467-023-38990-9), 2023-06-02
Supplement: 41467_2023_38990_MOESM3_ESM.pdf [file 41467_2023_38990_MOESM3_ESM.pdf]

## **Description of Additional Supplementary Files**

File Name: Supplementary Data 1

Description: Data behind Figure 2

File Name: Supplementary Data 2

Description: Data behind Figure 3

File Name: Supplementary Data 3

Description: Data behind Figure 4

File Name: Supplementary Data 4

Description: Data behind Figure 5
